# Supplementary material for: VAS3947 Induces UPR-Mediated Apoptosis through Cysteine Thiol Alkylation in AML Cell Lines
Source: PubMed Central journal article supplement (PMC7432790; doi:10.3390/ijms21155470), 2020-07-31
Supplement: ijms-21-05470-s001.pdf [file ijms-21-05470-s001.pdf]

## Supplementary material

### Supplementary materials and methods.

#### *Hydrogen peroxide (H<sub>2</sub>O<sub>2</sub>) incubation*

Cells were seeded in a 6 well plate at  $2 \times 10^5$  cells/mL and preincubated for 1 h w/wo hydrogen peroxide (H<sub>2</sub>O<sub>2</sub>; 100  $\mu$ M). Then, VAS3947 (4  $\mu$ M) or DMSO was added and incubated at 37°C. After 72 h, alive cells were manually enumerated by Trypan blue exclusion, using a microscope.

### Supplementary figures

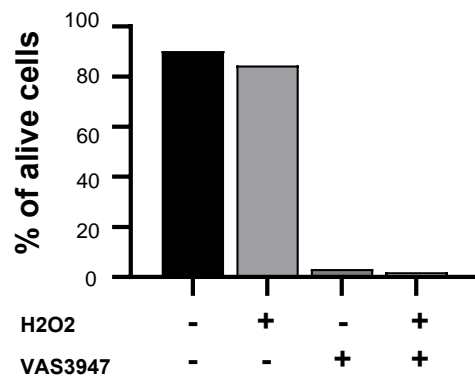

**Figure S1.** Effect of H<sub>2</sub>O<sub>2</sub> (100  $\mu$ M) supplementation on MV-4-11 cells incubated with VAS3947 at 4  $\mu$ M ( $n = 1$ ).

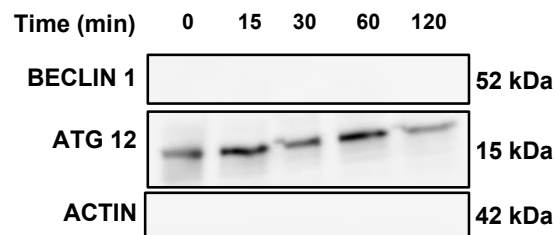

**Figure S2.** Effect of VAS3947 (4  $\mu$ M) on the expression of autophagy proteins in MV-4-11 cells.
